# Supplementary material
Source: Springer Nature journal article supplement (https://www.springermedizin.de/resource/supplementary/12889_2012_4549_MOESM2_ESM.pdf/9492186)

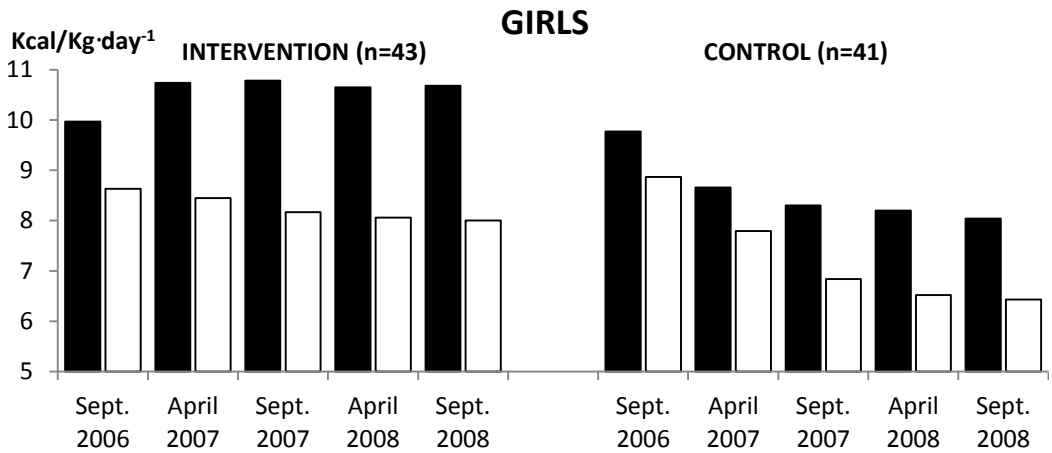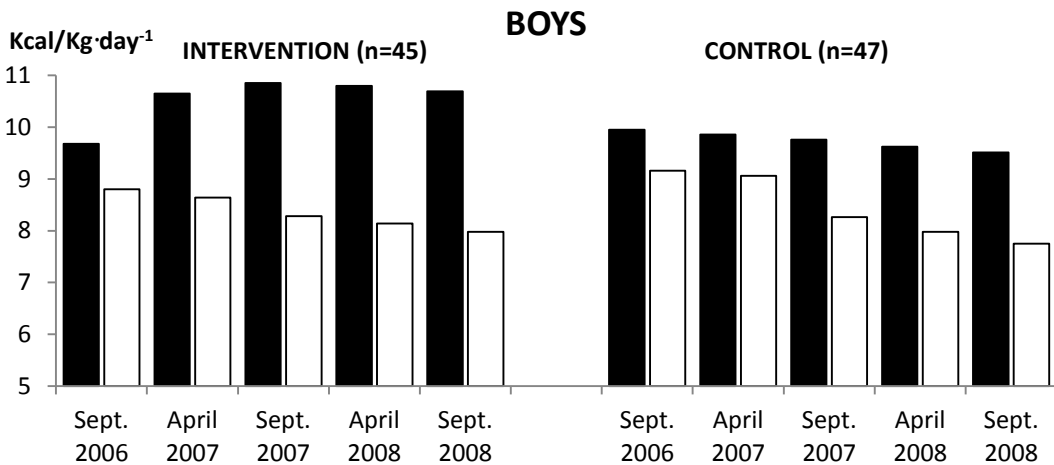

Supplement: MOESM2 [file 9492186]
